# Supplementary material for: Erlernen „erweiterter Maßnahmen“ in der Ausbildung zum Notfallsanitäter
Source: Springer Nature journal article supplement (doi:10.1007/s10049-019-0567-3), 2019-02-01
Supplement: MOESM1 [file 16439256]

**Fragebogen für die Evaluation von subjektiven Kompetenzen „erweiterter Maßnahmen“ und zur Erfassung des Lernortes**

| **Fragenkatalog** | |
| --- | --- |
| **Q1** | Sie sollten in Ihrer Ausbildung die Maßnahme "IV-Zugang" erlernen.  Welches Kompetenzlevel haben Sie Ihrer Einschätzung nach erreicht? |
| **Q2** | Sie sollten in Ihrer Ausbildung die Maßnahme "intraossärer Zugang" erlernen.  Welches Kompetenzlevel haben Sie nach Ihrer Einschätzung erreicht? |
| **Q3** | Sie sollten in Ihrer Ausbildung die Maßnahme "Anlage eines supraglottischen Atemwegs (z.B. Larynxtubus /Larynxmaske)" erlernen.  Welches Kompetenzlevel haben Sie nach Ihrer Einschätzung erreicht? |
| **Q4** | Sie sollten in Ihrer Ausbildung die Maßnahme "Laryngoskopie und Anwendung der Magillzange" erlernen.  Welches Kompetenzlevel haben Sie nach Ihrer Einschätzung erreicht? |
| **Q5** | Sie sollten in Ihrer Ausbildung die Maßnahme "Nichtinvasive CPAP-Beatmung" erlernen.  Welches Kompetenzlevel haben Sie nach Ihrer Einschätzung erreicht? |
| **Q6** | Sie sollten in Ihrer Ausbildung die Maßnahme "Tourniquet /pneumatische Blutsperre" erlernen.  Welches Kompetenzlevel haben Sie nach Ihrer Einschätzung erreicht? |
| **Q7** | Sie sollten in Ihrer Ausbildung die Maßnahme "Anlage einer Beckenschlinge" erlernen.  Welches Kompetenzlevel haben Sie nach Ihrer Einschätzung erreicht? |
| **Q8** | Sie sollten in Ihrer Ausbildung die Maßnahme "Thoraxpunktion beim Spannungspneumothorax" erlernen.  Welches Kompetenzlevel haben Sie nach Ihrer Einschätzung erreicht? |
| **Q9** | Sie sollten in Ihrer Ausbildung die Maßnahme "manuelle Defibrillation" erlernen.  Welches Kompetenzlevel haben Sie nach Ihrer Einschätzung erreicht? |
| **Q10** | Sie sollten in Ihrer Ausbildung die Maßnahme "Kardioversion" erlernen.  Welches Kompetenzlevel haben Sie nach Ihrer Einschätzung erreicht? |
| **Q11** | Sie sollten in Ihrer Ausbildung die Maßnahme "externe Schrittmacheranlage" erlernen.  Welches Kompetenzlevel haben Sie nach Ihrer Einschätzung erreicht? |
| **Q12** | Sie sollten in Ihrer Ausbildung die Maßnahme "Geburtsbegleitung" erlernen.  Welches Kompetenzlevel haben Sie nach Ihrer Einschätzung erreicht? |
| **Q13** | Sie sollten in Ihrer Ausbildung die Maßnahme "Umgang mit tracheotomierten Patienten und Wechsel einer Trachealkanüle" erlernen.  Welches Kompetenzlevel haben Sie nach Ihrer Einschätzung erreicht? |
| **Q14** | Sie sollten in Ihrer Ausbildung die Maßnahme "tiefes bronchiales Absaugen" erlernen.  Welches Kompetenzlevel haben Sie nach Ihrer Einschätzung erreicht? |
| **Q15** | Sie sollten in Ihrer Ausbildung die Maßnahme "Verabreichen von Esketamin zur Analgesie" erlernen.  Welches Kompetenzlevel haben Sie nach Ihrer Einschätzung erreicht? |
| **Q16** | Sie sollten in Ihrer Ausbildung die Maßnahme "Verabreichen peripher wirkender Analgetika" erlernen.  Welches Kompetenzlevel haben Sie nach Ihrer Einschätzung erreicht? |
| **Q17** | Sie sollten in Ihrer Ausbildung die Maßnahme "Opiate zur Analgesie" erlernen. Welches Kompetenzlevel haben Sie nach Ihrer Einschätzung erreicht?  Sie sollten in Ihrer Ausbildung die Maßnahme "Gabe von intravenösen Antihypertensiva" erlernen.  Welches Kompetenzlevel haben Sie nach Ihrer Einschätzung erreicht? |
| **Q18** | Sie sollten in Ihrer Ausbildung die Maßnahme "Medikamentenverneblung bei Bronchospastik" erlernen.  Welches Kompetenzlevel haben Sie nach Ihrer Einschätzung erreicht? |
| **Antwortmöglichkeiten zu jeder Frage** | |
| **1** | Ich habe die Maßnahme nicht erlernt und wende sie nicht an. |
| **2** | Ich kann die Maßnahme beschreiben. |
| **3** | Ich kann die Maßnahme einordnen und bewerten (Handlungs- und Begründungswissen) |
| **4** | Ich kann die Maßnahme unter Anleitung durchführen (Handlungskompetenz 3a) |
| **5** | Ich führe die Maßnahme selbstständig und situationsadäquat in Kenntnis der Konsequenzen durch (Handlungskompetenz 3b) |
| **Zu jeder Frage (Q1-Q18): An welchem Lernort haben Sie diese Maßnahme erlernt?** | |
| **1** | Notfallsanitäterschule (Maßnahme wurde erlernt / wurde nicht erlernt) |
| **2** | Klinikpraktikum (Maßnahme wurde erlernt / wurde nicht erlernt) |
| **3** | Rettungsdienstalltag (Maßnahme wurde erlernt / wurde nicht erlernt) |
